# Supplementary material for: Water-soluble and Cytocompatible Phospholipid Polymers for Molecular Complexation to Enhance Biomolecule Transportation to Cell in vitro
Source: Preprints.org preprint supplement (doi:10.20944/preprints202007.0302.v1), 2020-07-14
Supplement: Supplementary file 1 [file supplementary]

**PMB37**

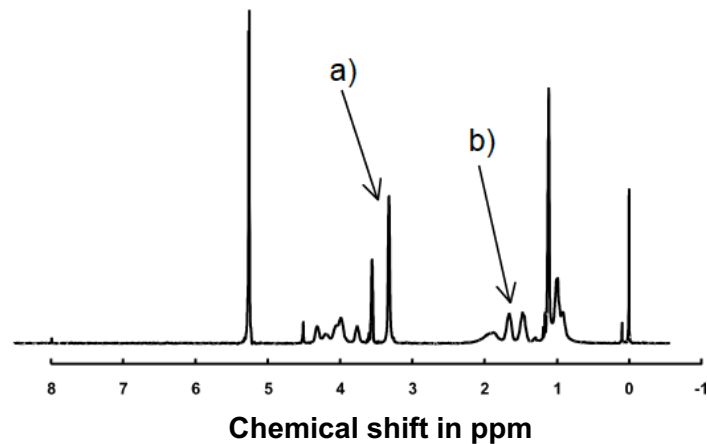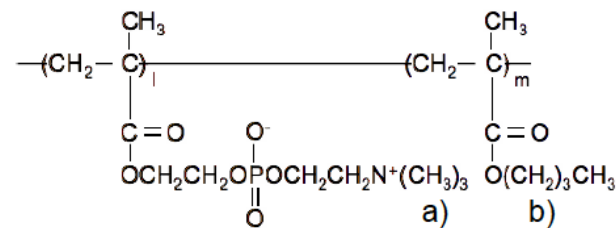

**PMA37**

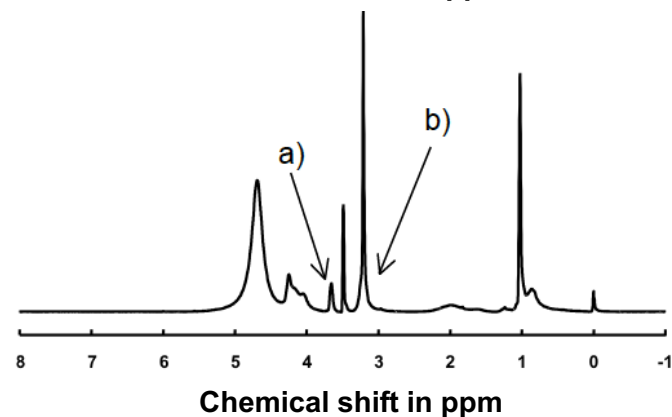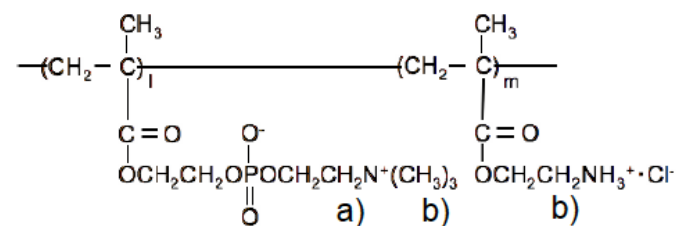

**PMBA154M**

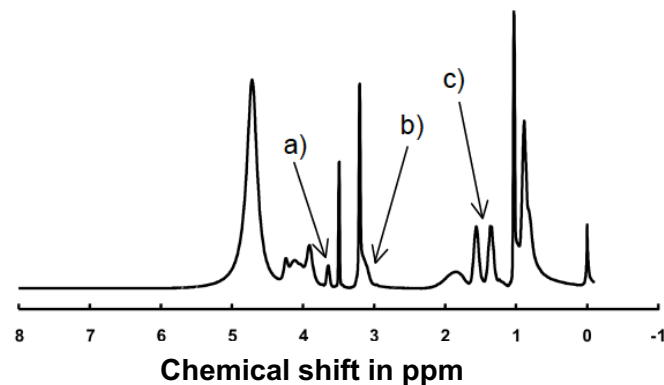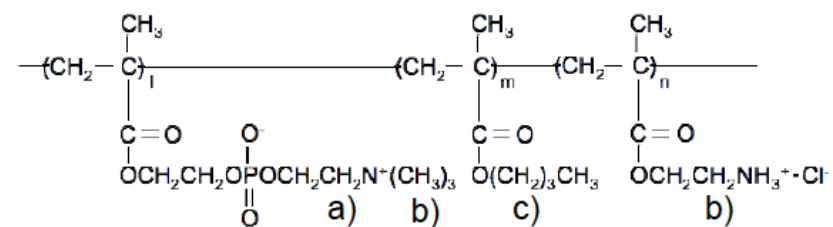

Figure S1. <sup>1</sup>H-NMR spectra of representative polymers used in this study.

**siRNA only**

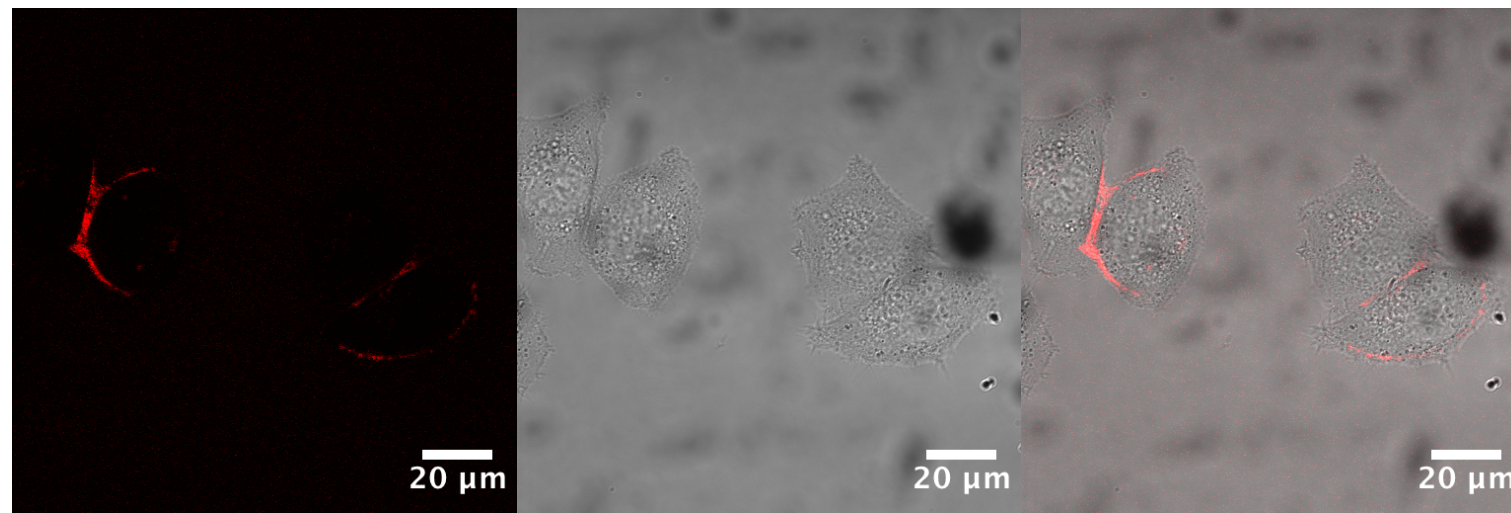

Figure S2. Laser confocal microscopic images of HeLa-Luc cells after contact with Cy3-labeled siRNA at 37 °C.

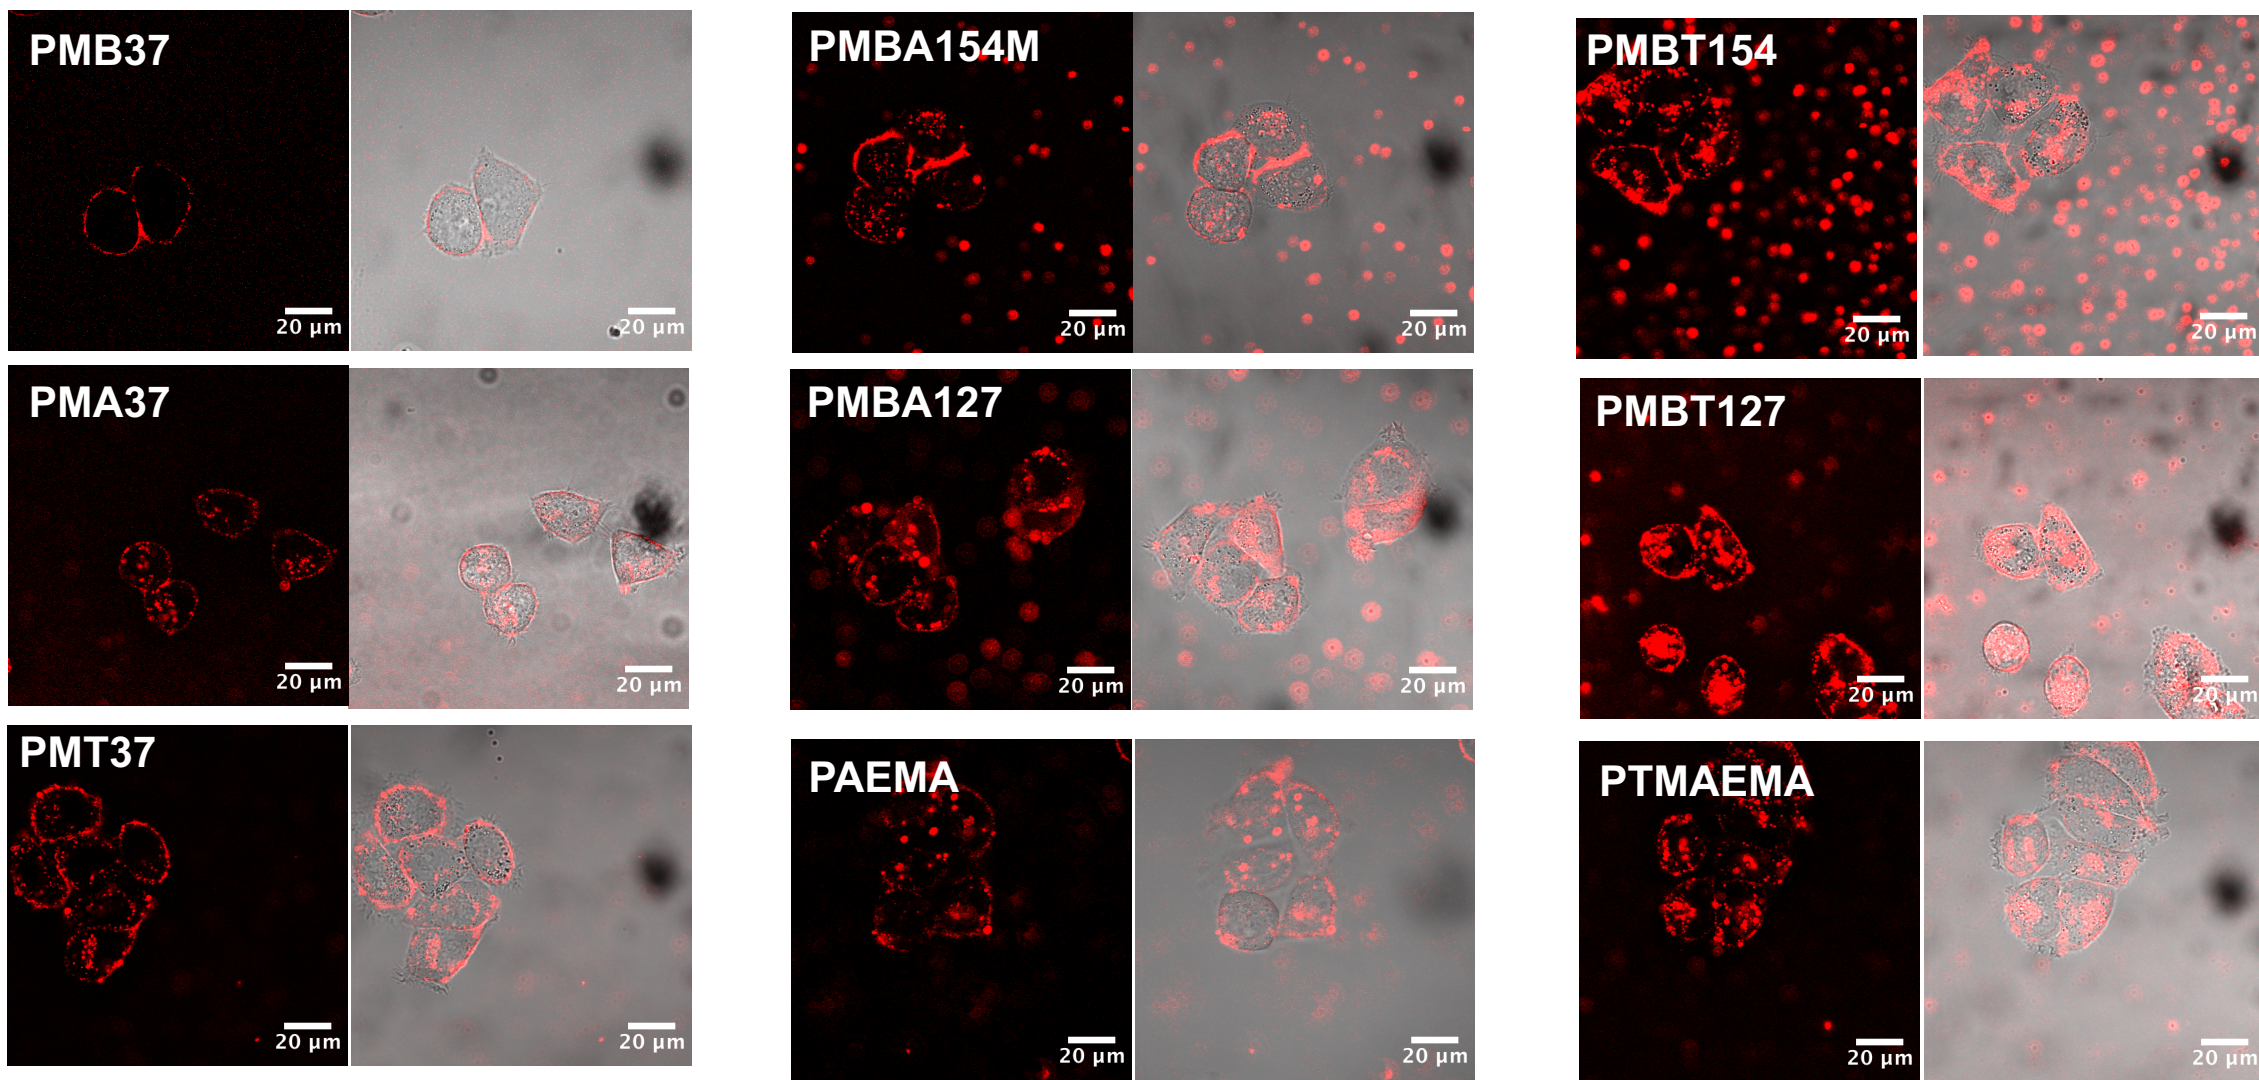

Figure S3. Laser confocal microscopic images of HeLa-Luc cells internalized with various Cy3-labeled siRNA/MPC polymer complexes at 37 °C.



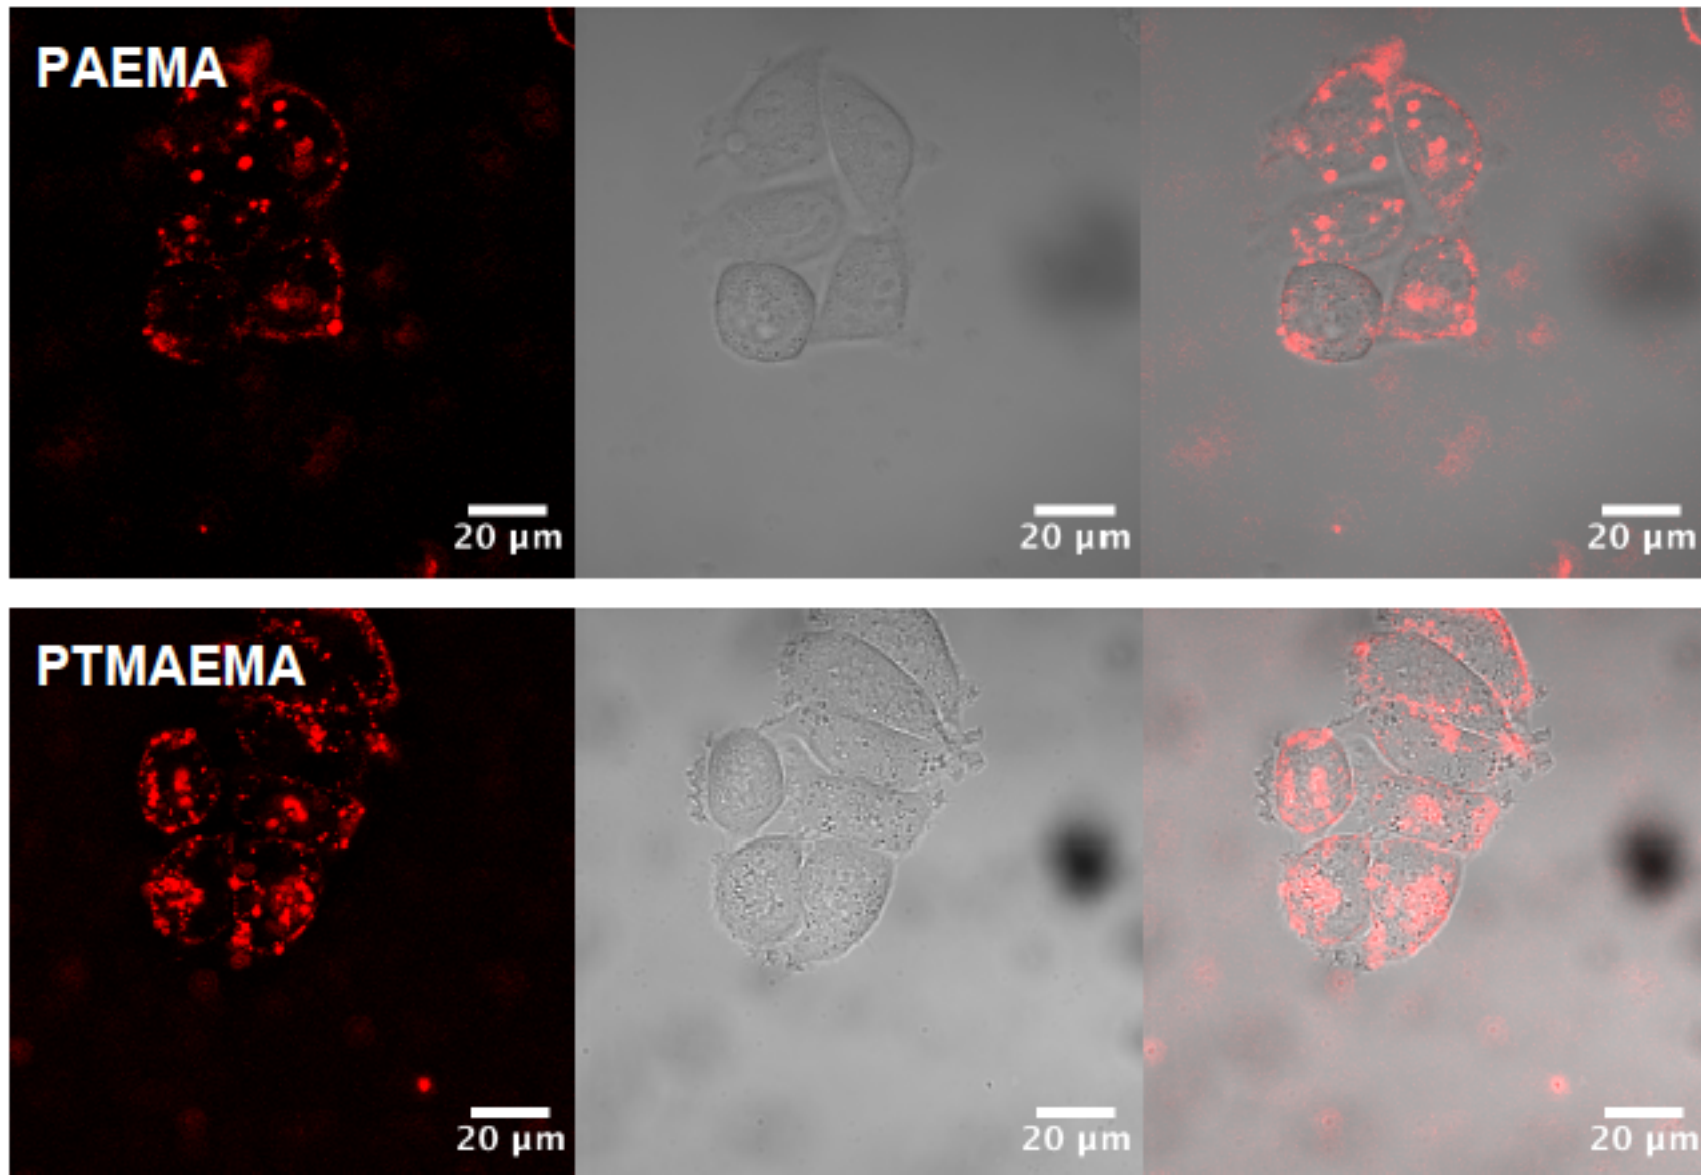

Figure S4. Laser confocal microscopic images of HeLa-Luc cells internalized with Cy3-labeled siRNA/cationic polymer complexes at 37 °C.
